# Supplementary material
Source: PubMed Central journal article supplement (PMC9879733)
Supplement: NIHMS1864933-supplement-Pediatrics_-_Supplementary_materials.pdf [file NIHMS1864933-supplement-Pediatrics_-_Supplementary_materials.pdf]

## Supplemental Information

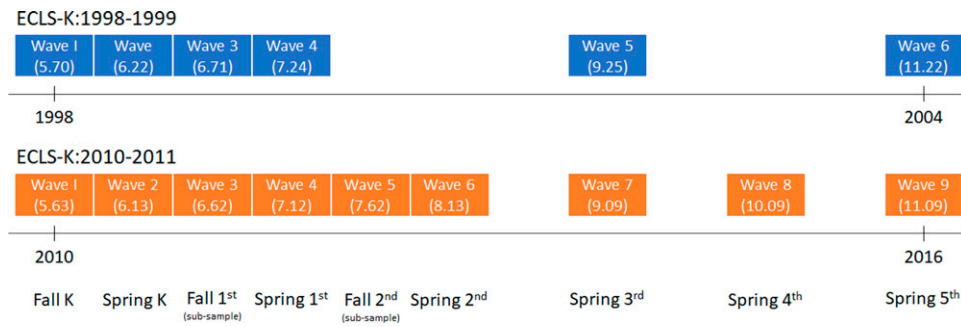

### SUPPLEMENTAL FIGURE 3

Survey waves of the Early Childhood Longitudinal studies and the mean age in years at each data wave. Notes: 1. Sub-samples in the fall first and second grade were designed to examine changes over the summer months. The subsamples were designed to be representative of the full sample; 2. The Early Childhood Longitudinal Study–Kindergarten: 1998–1999 cohort included an additional seventh data wave in eighth grade, but we were not able to include that in the current analysis because there was no comparable wave after fifth grade in Early Childhood Longitudinal Study–Kindergarten: 2010–2011.

### Annual Incidence of Obesity

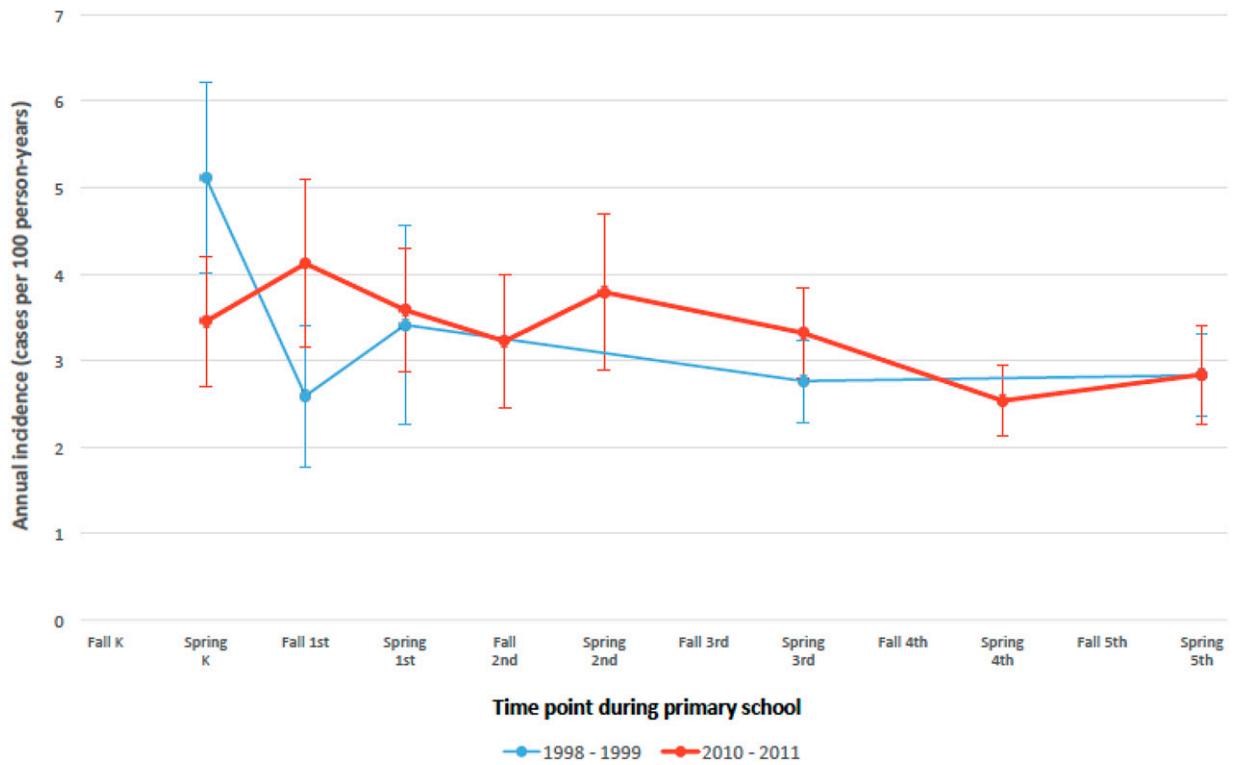

#### SUPPLEMENTAL FIGURE 4

Sensitivity analysis of annual obesity incidence using unbalanced measurement waves, including all data waves from the 2010 cohort. Notes: Children with obesity at any previous wave were excluded from calculations for subsequent waves because they were not eligible for incident obesity. Whiskers indicate 95% confidence intervals. Data: Early Childhood Longitudinal Study–Kindergarten cohorts of 1998 and 2010.
